# Supplementary material for: Intestine-Targeted DGAT1 Inhibition Improves Obesity and Insulin Resistance without Skin Aberrations in Mice
Source: PubMed Central journal article supplement (PMC4236014; doi:10.1371/journal.pone.0112027), 2014-11-18
Supplement: pone.0112027.s001.pdf [file pone.0112027.s001.pdf]

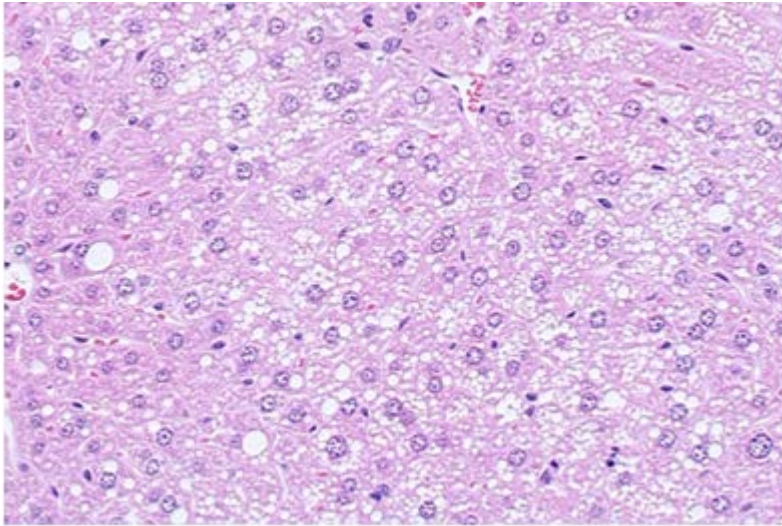

vehicle

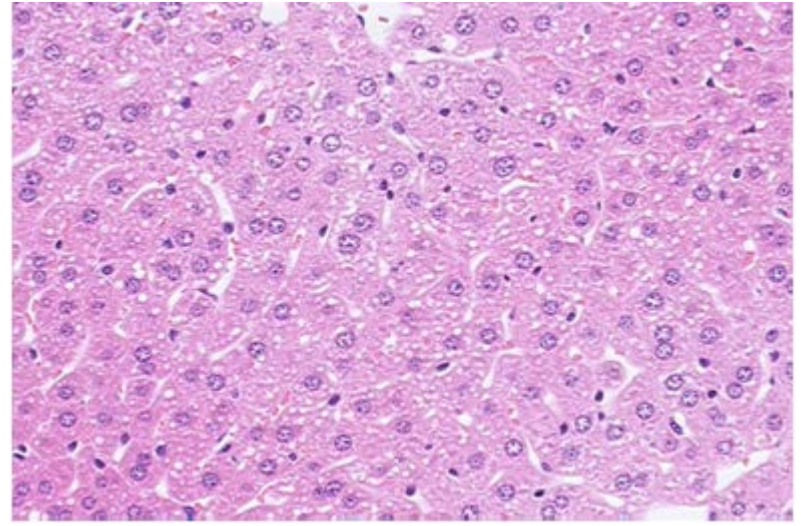

10 mg/kg

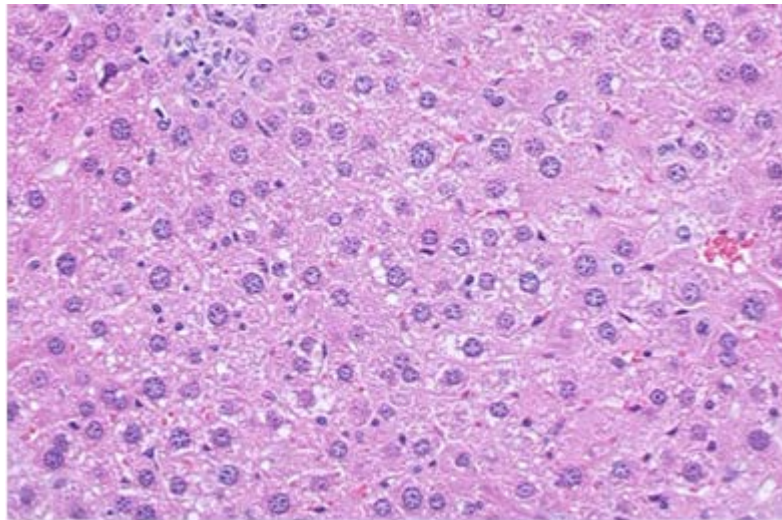

30 mg/kg
